# Supplementary material for: Identification and Expression Profiling of the Auxin Response Factors in Capsicum annuum L. under Abiotic Stress and Hormone Treatments
Source: PubMed Central journal article supplement (PMC5751320; doi:10.3390/ijms18122719), 2017-12-15
Supplement: ijms-18-02719-s001.pdf [file ijms-18-02719-s001.pdf]

Supplementary

# Identification and Expression Profiling of the Auxin Response Factors in *Capsicum annuum* L. under Abiotic Stress and Hormone Treatments

Chenliang Yu <sup>1,\*</sup>, Yihua Zhan <sup>2</sup>, Xuping Feng <sup>3</sup>, Zong-An Huang <sup>4</sup> and Chendong Sun <sup>2</sup>

<sup>1</sup> Vegetable Research Institute, Zhejiang Academy of Agricultural Sciences, Hangzhou 310021, China

<sup>2</sup> State Key Laboratory of Plant Physiology and Biochemistry, College of Life Sciences, Zhejiang University, Hangzhou 310058, China; 21107014@zju.edu.cn (Y.Z.); 100550991@qq.com (C.S.)

<sup>3</sup> Key Laboratory of Spectroscopy, Ministry of Agriculture, College of Biosystems Engineering and Food Science, Zhejiang University, Hangzhou 310058, China; pimmmx@163.com

<sup>4</sup> Institute of Vegetable Sciences, Wenzhou Academy of Agricultural Sciences, Wenzhou 325014, China; huangzongan1978@163.com

\* Correspondence: 21007030@zju.edu.cn; Tel.: +86-18768141629

```
1: CaARF5 100.00
2: CaARF15 40.58 100.00
3: CaARF16 47.65 73.42 100.00
4: CaARF8 40.78 60.37 59.66 100.00
5: CaARF17 42.88 64.98 64.47 69.45 100.00
6: CaARF18 30.13 32.51 39.09 31.36 33.96 100.00
7: CaARF7 26.98 32.96 38.94 31.40 32.79 37.37 100.00
8: CaARF9 27.53 34.02 40.99 33.66 33.82 38.57 79.26 100.00
9: CaARF4 31.39 31.66 40.45 30.47 31.82 39.91 44.50 45.07 100.00
10: CaARF10 29.65 33.86 41.48 33.04 34.15 37.48 53.62 56.29 47.71 100.00
11: CaARF21 28.48 36.30 43.35 32.99 34.34 37.52 45.45 46.00 46.46 49.44 100.00
12: CaARF13 28.57 35.64 42.72 33.87 35.24 39.20 46.38 47.73 48.75 51.47 79.31 100.00
13: CaARF6 29.90 39.90 40.99 34.98 39.32 44.17 67.45 69.01 63.03 68.10 85.12 83.03 100.00
14: CaARF22 22.39 29.69 41.03 27.85 29.22 29.21 40.68 41.03 40.73 42.37 52.35 54.64 90.65 100.00
15: CaARF2 31.19 32.27 39.81 32.32 32.80 42.88 31.27 31.92 31.34 32.48 33.39 34.49 38.28 26.41 100.00
16: CaARF1 31.08 32.68 40.81 32.14 31.68 40.56 35.94 37.54 37.30 38.66 39.19 40.00 48.84 37.22 32.94 100.00
17: CaARF11 31.93 32.54 40.92 30.76 31.12 40.36 37.18 39.21 38.23 39.21 41.25 39.83 48.80 35.05 35.00 54.93 100.00
18: CaARF20 31.62 34.96 42.16 32.95 33.14 41.05 38.22 39.58 37.96 39.82 41.25 40.52 47.85 37.84 37.55 64.80 60.99 100.00
19: CaARF3 29.41 31.95 42.26 31.73 31.19 40.76 36.03 36.81 36.60 37.27 39.32 40.83 48.34 33.73 35.85 47.47 49.85 51.25 100.00
20: CaARF19 29.23 32.99 42.26 31.79 31.41 39.44 35.32 36.50 35.44 36.44 38.31 39.47 46.92 31.18 35.31 46.67 47.66 48.74 77.32 100.00
21: CaARF12 33.41 36.00 41.75 34.35 33.52 43.93 39.31 40.62 38.72 40.77 41.54 41.00 50.71 35.41 36.94 51.73 54.84 54.84 52.93 50.30 100.00
22: CaARF14 37.20 41.57 40.00 41.72 39.88 47.53 42.94 44.07 44.38 42.86 51.41 50.28 44.09 45.08 43.82 61.19 65.00 64.07 58.99 55.80 86.81 100.00
```

Figure S1. Sequence identity matrix of pepper ARF proteins. Clustal Omega (<http://www.ebi.ac.uk/Tools/msa/clustalo/>) program were employed to examine sequence identity of 22 pepper ARF proteins.

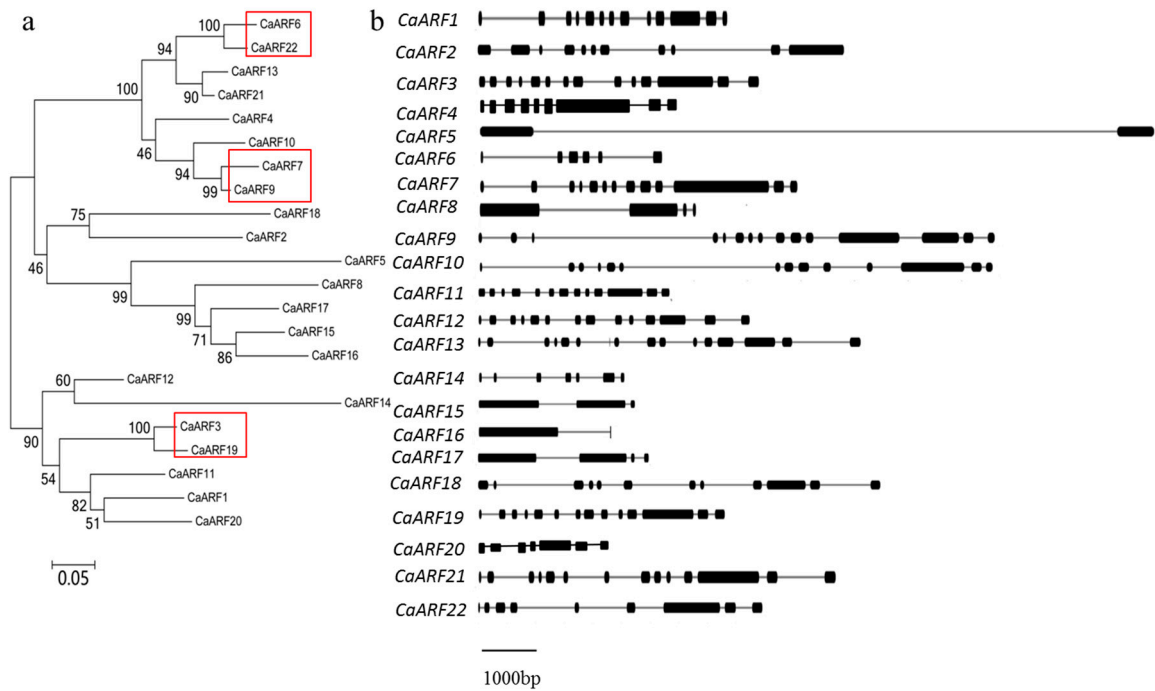

Figure S2: Phylogenetic relationships of CaARF proteins (a) and Gene structure analysis of *CaARF* genes (b).

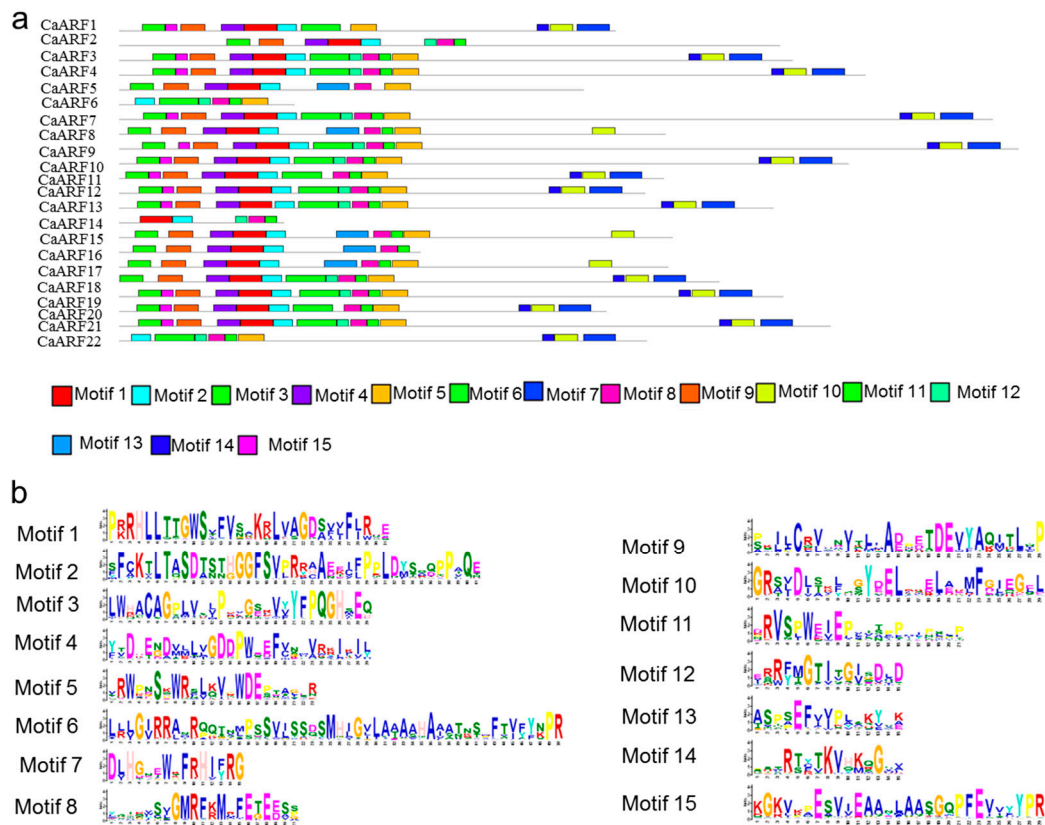

**Figure S3.** Conserved motif analysis of CaARF proteins. a. Conserved motif of CaARF proteins predicted by MEME tool. b. Conserved motif sequences of CaARF proteins.

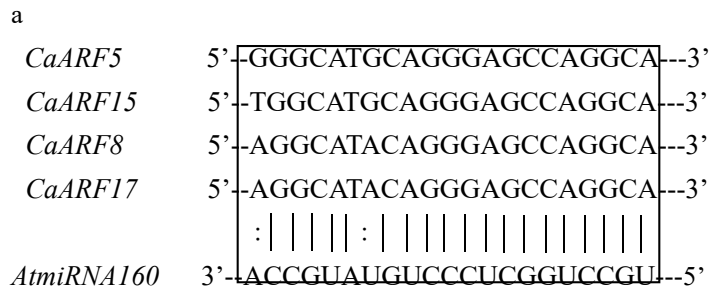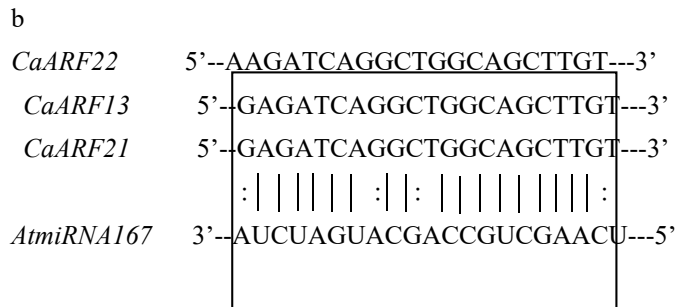

Figure S4. Sequences of *AtmiRNA160* (a) and target *AtmiRNA167* (b) sites on *CaARF* mRNAs. The Watson-Crick base pairings to the *AtmiRNA160* and *AtmiRNA167* sequence are shown.

**Table S1.** List of primers used in the present study.

| <b>Gene name</b>   | <b>Forward primer(5'to3')</b>  | <b>Reverse primer(5'to3')</b>  |
|--------------------|--------------------------------|--------------------------------|
| <i>CaARF1 qRT</i>  | ACAAACCGAGATATATGGGCA<br>CT    | GCCTTTTGTCTTCCCTGCG            |
| <i>CaARF2 qRT</i>  | TCTCTGCACAGTGATCAGTCA          | GGGTATAGGGGAAGGGTGGT           |
| <i>CaARF3 qRT</i>  | TACGGAGCTTTGGCGTTCAT           | CACCACGCGGCATAGTATCT           |
| <i>CaARF4 qRT</i>  | AGATGGCCTGGTTCCAAGTG           | CGCCCCCAAAAAGGTAGACT           |
| <i>CaARF5 qRT</i>  | CCCTTCATTCTCTGCCGTGT           | CAACCTCCTTCTCCACGTCC           |
| <i>CaARF6 qRT</i>  | AACTTCTCACATTGGCAGTGCT<br>C    | GAGTTGCACGACGAATTCCC           |
| <i>CaARF7 qRT</i>  | TTGGGCCAATCCAGGATCAC           | CCTCCCCGTGCAGTTATTGT           |
| <i>CaARF8 qRT</i>  | TCTGGCCGTTTAGGCACATT           | CCGATTGGGTTTCCCTGTCCA          |
| <i>CaARF9 qRT</i>  | AGCATACTGCCAACGGGAAT           | GCTGCAACCCTTCAAAGAA            |
| <i>CaARF10 qRT</i> | AGCCTGTCTGACACCATTT            | TGGTTTGGTATCAAGCTCAGTC         |
| <i>CaARF11 qRT</i> | ACAAGCAGCTGATCACACGA           | AGCTGAGCTGGATGCAACAT           |
| <i>CaARF12 qRT</i> | TGCTTTCATCTTTCTCAGGCAA         | AACACCGAGAAGAAGGTGCC           |
| <i>CaARF13 qRT</i> | ATATATTTTCGCGGACAAGCGG         | CTGCTGCAGCTAGAAGACCA           |
| <i>CaARF14 qRT</i> | ATTGGTTGCTGGCAATGCTT           | ATGAATCCCAAGACGAGAAGAA<br>G    |
| <i>CaARF15 qRT</i> | TTCACCGTGGAGGCTTCTTC           | GGTGGCCATCGAGAGGAAAA           |
| <i>CaARF16 qRT</i> | CGCGGAGGGTATTCAGCTTT           | ACGTGACGCCTTCAAAAGA            |
| <i>CaARF17 qRT</i> | AACCCGTGTGCTCTATCACG           | GTTGCGAGACCAGTGATCCA           |
| <i>CaARF18 qRT</i> | TCAGGAGCTGATTGCCAAGG           | AGCCCGTTTCTAGGTCTTGC           |
| <i>CaARF19 qRT</i> | TCGGAACAAGAAGTGGCTGG           | TAGCATCATAGCCTTCTGCAACA        |
| <i>CaARF20 qRT</i> | TCACATGCAAGGGGTAGCTG           | GCCAAGGATGATCGCCATA            |
| <i>CaARF21 qRT</i> | GGTTTCTTGCAGTCTCCGA            | CCAACAAGCCTTCTAGCCCA           |
| <i>CaARF22 qRT</i> | ATGTGGAAGGAAGGACAGCC           | CAGTCTGGGGTCAATTGCT            |
| <i>CaACTIN</i>     | GCCCCTTGTITGTGACAATG           | ACACGAAGCTCATTGTAGAA           |
| <i>CaARF2 qRT</i>  | GGTACCATGGCAACGATTTATC<br>TCTG | GTCGACCAGAGCAATATCAAGA<br>AGCA |
| <i>CaARF10 qRT</i> | GGTACCATGAAGGCACCATCA<br>AACGG | GTCGACTTCAGTCCACTGCTAG<br>CTT  |
| <i>CaARF12 qRT</i> | GGTACCATGGCAAACCTTTCTG<br>GAAA | GTCGACTGCTTCCCCTCATTGCT<br>AA  |
